# Supplementary material
Source: Springer Nature journal article supplement (https://www.springermedizin.de/resource/supplementary/12963_2011_189_MOESM1_ESM.pdf/9572354)
Supplement: MOESM1 [file 9572354]

Health Utilities Index

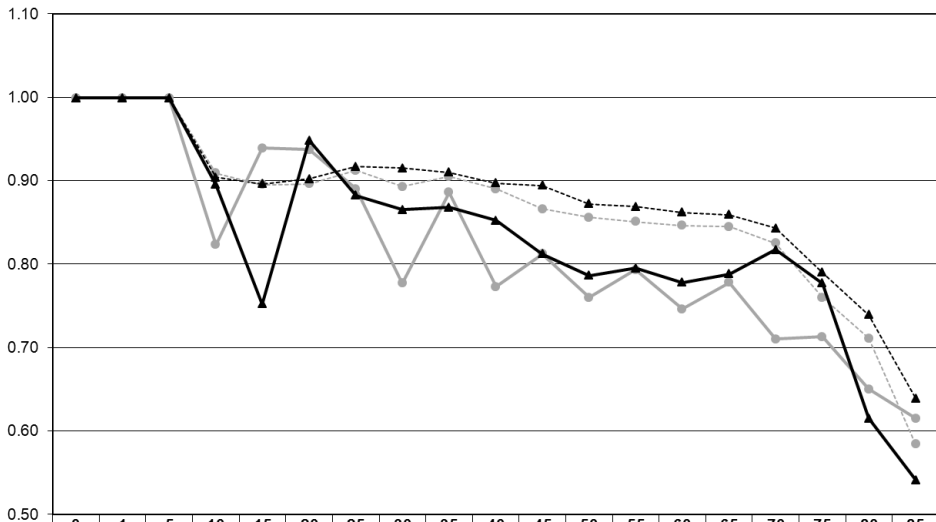

|                             |       |       |       |       |       |       |       |       |       |       |       |       |       |       |       |       |       |       |       |
|-----------------------------|-------|-------|-------|-------|-------|-------|-------|-------|-------|-------|-------|-------|-------|-------|-------|-------|-------|-------|-------|
| ---●--- Females, without DM | 0.999 | 0.999 | 0.999 | 0.909 | 0.895 | 0.896 | 0.912 | 0.893 | 0.905 | 0.890 | 0.866 | 0.856 | 0.851 | 0.846 | 0.845 | 0.825 | 0.760 | 0.711 | 0.584 |
| ---▲--- Males, without DM   | 0.999 | 0.999 | 0.999 | 0.904 | 0.896 | 0.902 | 0.917 | 0.915 | 0.910 | 0.897 | 0.894 | 0.872 | 0.869 | 0.862 | 0.859 | 0.843 | 0.790 | 0.739 | 0.639 |
| —●— Females, with DM        | 0.999 | 0.999 | 0.999 | 0.823 | 0.939 | 0.937 | 0.890 | 0.777 | 0.886 | 0.773 | 0.812 | 0.760 | 0.793 | 0.746 | 0.778 | 0.710 | 0.713 | 0.650 | 0.615 |
| —▲— Males, with DM          | 0.999 | 0.999 | 0.999 | 0.895 | 0.752 | 0.948 | 0.882 | 0.865 | 0.868 | 0.852 | 0.812 | 0.786 | 0.795 | 0.778 | 0.788 | 0.817 | 0.777 | 0.615 | 0.541 |

Age, years
